# Supplementary material for: A conserved RNA structure is essential for a satellite RNA-mediated inhibition of helper virus accumulation
Source: Nucleic Acids Res. 2019 Jul 3;47(15):8255–71. doi: 10.1093/nar/gkz564 (PMC6735963; doi:10.1093/nar/gkz564)
Supplement: gkz564_Supplemental_File [file gkz564_supplemental_file.pdf]

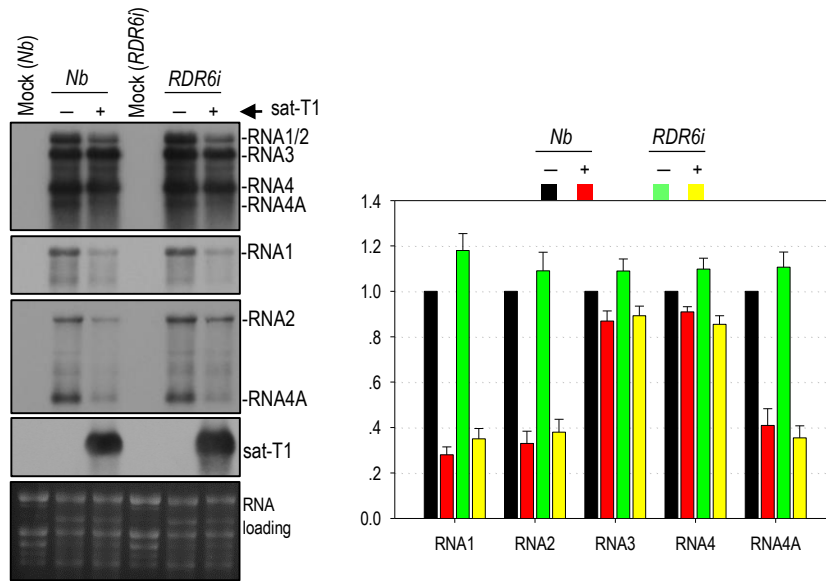

**FIG S1.** RDR6 was not required for sat-T1 to inhibit the accumulation of CMV RNAs 1 and 2 in *Nicotiana benthamiana* plants. CMV alone or with sat-T1 was inoculated into *N. benthamiana* (*Nb*) or *RDR6i* plants via agroinfiltration. Total RNAs were extracted from the inoculated leaves at 6 days post-infiltration, and the accumulation of CMV and sat-T1 was examined by northern blot hybridization. The DNA oligonucleotide probes targeting CMV 3' UTR, 1a and 2b were used to detect all viral RNAs, RNA1, and RNA2 and its subgenomic RNA4A, respectively. The arbitrary signal intensities of the viral RNA bands were quantified using the program Gel pro 4.0, and the relative levels of the viral RNAs were calculated and shown in the chart on the right. The level of each viral RNA detected in the sat-T1-free, *Nb* plants was assigned a value of 1. Ethidium bromide-stained rRNAs were used as a loading control.

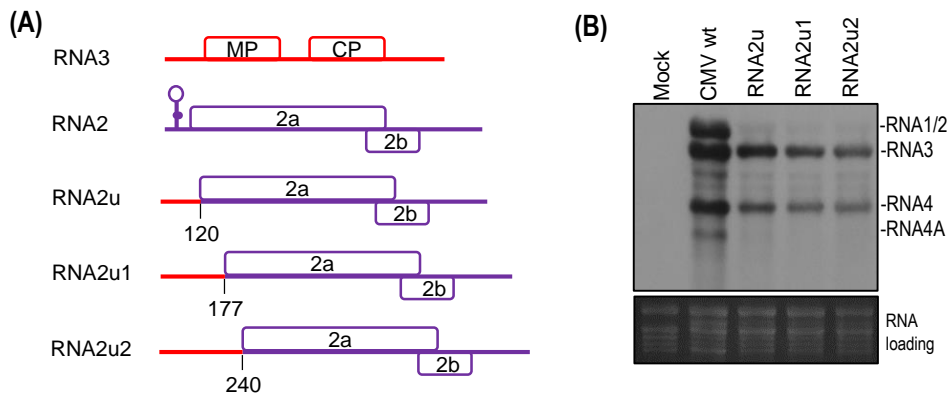

**FIG S2.** Replacement of the 5' UTR in RNA2 with the 5' terminal sequence of RNA3 at different length was detrimental to the replication of the modified RNA2s. (A) Schematic diagrams of CMV RNA3, RNA2 and its derivatives. RNA2u, RNA2u1 and RNA2u2 were generated by replacing the 5' UTR in CMV RNA2 with the 5' 120 nt (exactly 5' UTR), 177 nt and 240 nt of CMV RNA3, respectively. The start codon AUG of the 3a ORF was mutated to ACG in the constructs RNA2u1 and RNA2u2. (B) Northern blot hybridization analysis of the accumulation of CMV wt and its RNA2 mutants in *Nicotiana benthamiana* plants at 3 days post-infiltration. The ethidium bromide-stained rRNAs were used as a loading control.

**Table S1** Sequence analysis of these three stems in the predicted  $\gamma$ -shaped structure from 182 CMV satRNA sequences deposited in GenBank.

| Seq No. | yBs <sup>‡</sup> |             |                  |           | yH1 <sup>‡</sup> |             |                  |           | yH2                           |             |                     |           |
|---------|------------------|-------------|------------------|-----------|------------------|-------------|------------------|-----------|-------------------------------|-------------|---------------------|-----------|
|         | 5' sequence      | 3' sequence | Upb <sup>Ω</sup> | Frequency | 5' sequence      | 3' sequence | Upb <sup>Ω</sup> | Frequency | ARE including yH2 5' sequence | 3' sequence | Form yH2 structure? | Frequency |
| 1       | CUAGCAA          | UCUGUUAG    | 1                | 49 (27%)  | ACAUGGU          | ACCAUGG     | 1                | 73 (40%)  | UUUC                          | GAAA        | Y                   | 127 (70%) |
| 2       | CUAGCAGA         | UCUGUUAG    | 0                | 46 (25%)  | ACAUGGU          | ACUAUGG     | 1                | 25 (14%)  | CUUC                          | GAAA        | N                   | 22(11.5%) |
| 3       | CUAGCAAG         | UCUGUUAG    | 1                | 24 (13%)  | CCGUGGU          | ACCGCGG     | 0                | 17 (9%)   | AAUC                          | GAAA        | N                   | 18 (10%)  |
| 4       | CUAGCAA          | UCUGUAG     | 2                | 14 (8%)   | ACCUGGA          | ACCAGGG     | 2                | 14 (8%)   | AUUC                          | GAAA        | N                   | 7 (4%)    |
| 5       | CUAACAGA         | UCUGUAG     | 1                | 13 (7%)   | CCAUGGU          | ACCGUGG     | 0                | 11 (6%)   | AAUC                          | GAAC        | N                   | 4 (2%)    |
| 6       | CUAACAA          | UCUGUAG     | 2                | 9 (5%)    | CCAUGGU          | ACCAUGG     | 0                | 7 (4%)    | AUUC                          | GAAC        | N                   | 3 (1.5%)  |
| 7       | CUAGCAGA         | UCUGUAG     | 1                | 8 (4%)    | UCGCGGU          | ACCU CGG    | 1                | 6 (3%)    | UCUC                          | GAAA        | N                   | 1 (0.5%)  |
| 8       | CUAACAA          | UCUGUUAG    | 1                | 4 (2%)    | ACAUGGU          | ACCUUGG     | 2                | 5 (3%)    |                               |             |                     |           |
| 9       | CUAGCAAG         | UCUGUAG     | 2                | 4 (2%)    | UCGCGGA          | ACCU CGG    | 2                | 4 (2%)    |                               |             |                     |           |
| 10      | CUAGCAGG         | UCUGUUAG    | 0                | 3 (1.5%)  | CCAUGGU          | ACCA CGG    | 1                | 4 (2%)    |                               |             |                     |           |
| 11      | CUAACAGA         | UCUGUUAG    | 0                | 2 (1%)    | UCGGGGU          | ACUACCG     | 2                | 3 (1.5%)  |                               |             |                     |           |
| 12      | CUAGCAGA         | UCUGUUAU    | 1                | 1 (0.5%)  | ACAUGGU          | CCAUGGU     | 2                | 2 (1%)    |                               |             |                     |           |
| 13      | CAUGCAGA         | UCUGUUAG    | 2                | 1 (0.5%)  | ACGUGGU          | ACCACGG     | 1                | 2 (1%)    |                               |             |                     |           |
| 14      | CCAGCAGA         | UCUGUUAG    | 1                | 1 (0.5%)  | ACAUGGU          | ACCGUGG     | 1                | 1 (0.5%)  |                               |             |                     |           |
| 15      | CUAACAA          | UCUGUAG     | 2                | 1 (0.5%)  | CCGUGGU          | UCCGCGG     | 1                | 1 (0.5%)  |                               |             |                     |           |
| 16      | CUAACAGA         | UCUGUAG     | 2                | 1 (0.5%)  | CCAUGGU          | ACCUUGG     | 1                | 1 (0.5%)  |                               |             |                     |           |
| 17      | CUAACAGA         | UCUGAUG     | 3                | 1 (0.5%)  | GCAUGGU          | ACCAUGG     | 1                | 1 (0.5%)  |                               |             |                     |           |
| 18      |                  |             |                  |           | ACAUGG           | ACCAUGG     | 2                | 1 (0.5%)  |                               |             |                     |           |
| 19      |                  |             |                  |           | GCGGAGU          | ACUACCG     | 2                | 1 (0.5%)  |                               |             |                     |           |
| 20      |                  |             |                  |           | GCGGAGU          | ACUCCG      | 2                | 1 (0.5%)  |                               |             |                     |           |
| 21      |                  |             |                  |           | GCAAGU           | ACUCCG      | 3                | 1 (0.5%)  |                               |             |                     |           |
| 22      |                  |             |                  |           | ACCUGGA          | ACUUGGG     | 3                | 1 (0.5%)  |                               |             |                     |           |

<sup>‡</sup> Bases unpaired color red. <sup>Ω</sup> Upb means the number of unpaired bases.
